# Supplementary material
Source: PubMed Central journal article supplement (PMC4483465)

# Suppl. fig. 1

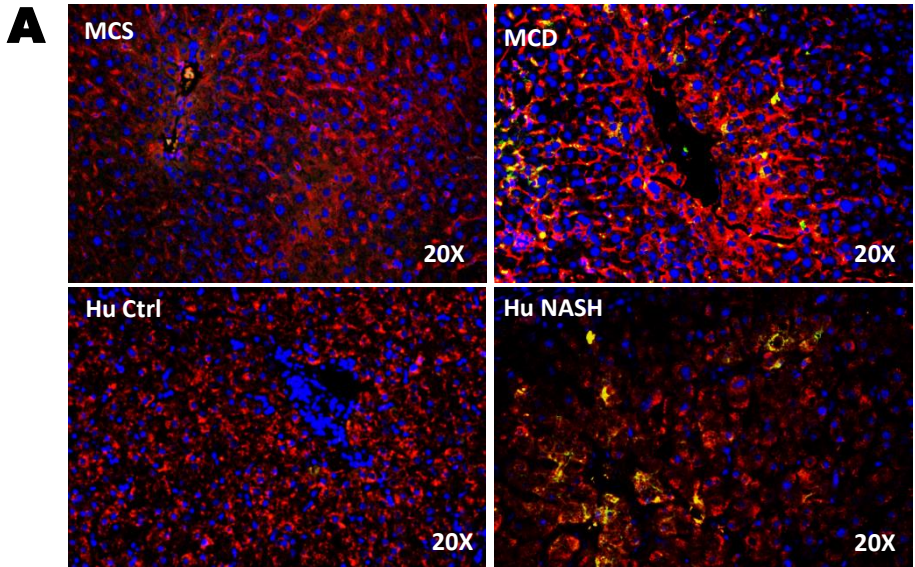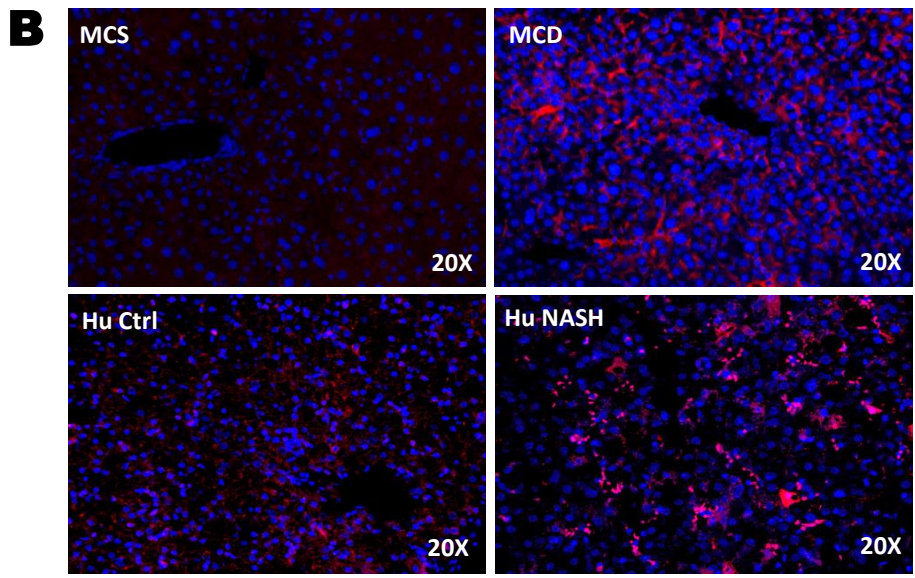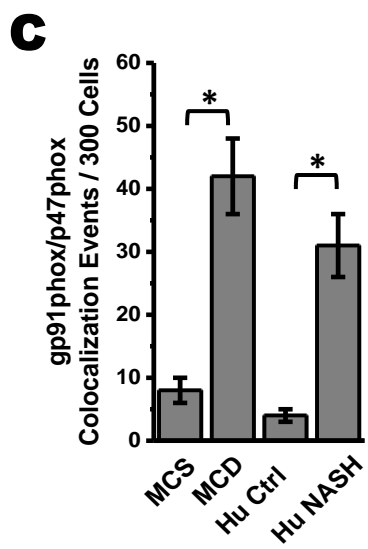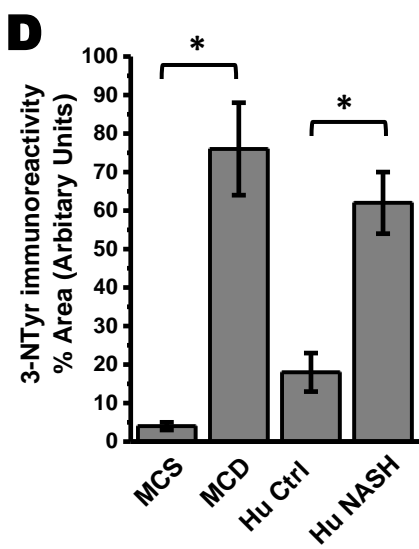

Supplement: mmc1.pdf [file mmc1.pdf]

# Suppl. fig. 2

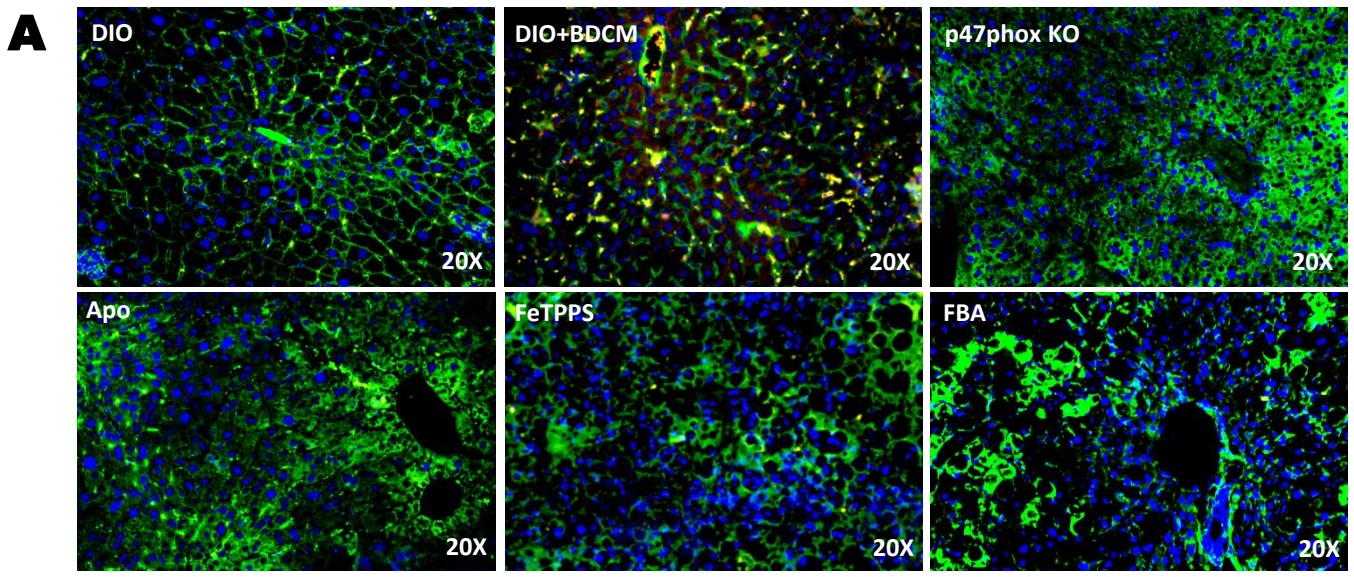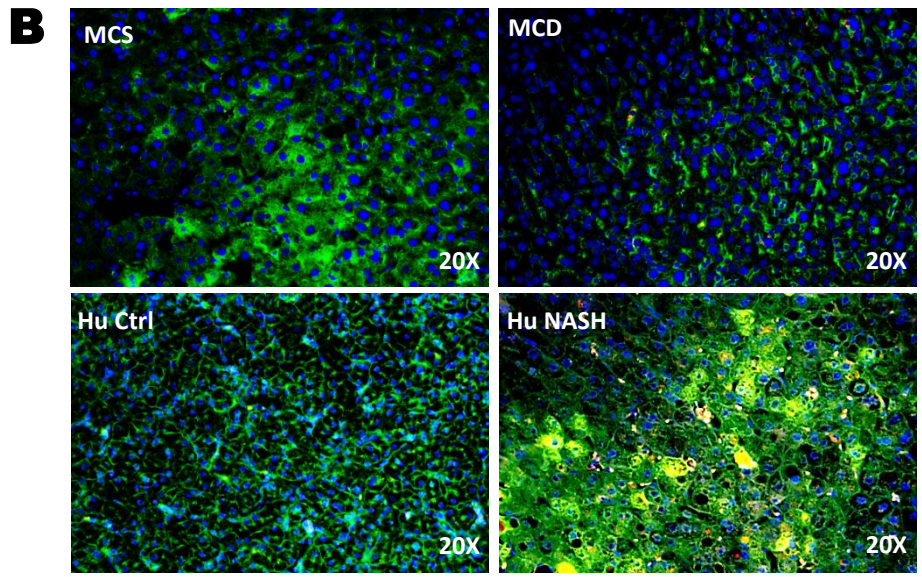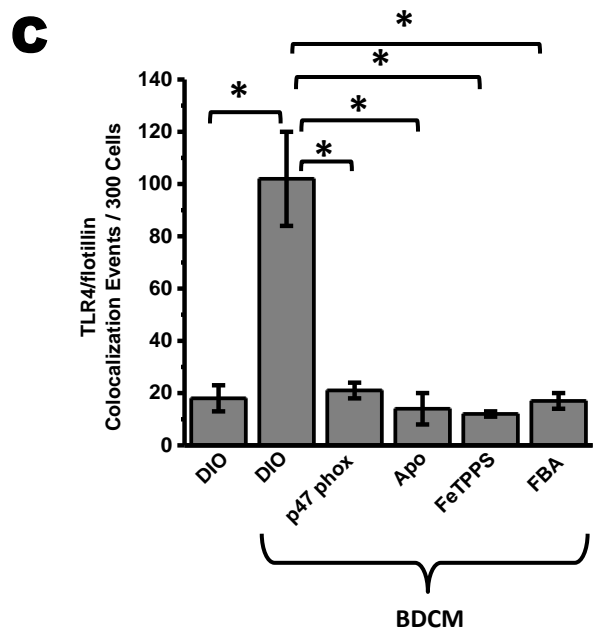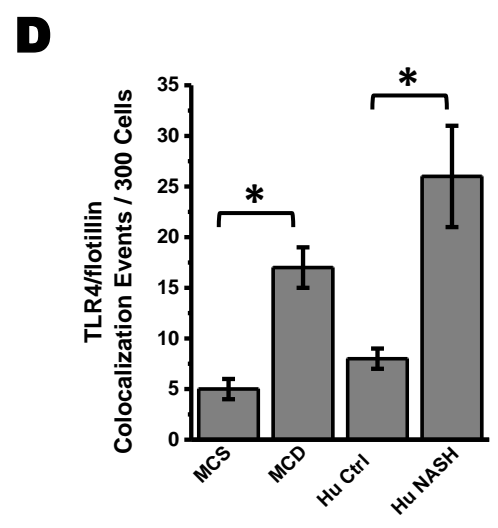

Supplement: mmc2.pdf [file mmc2.pdf]

# Suppl. fig. 3

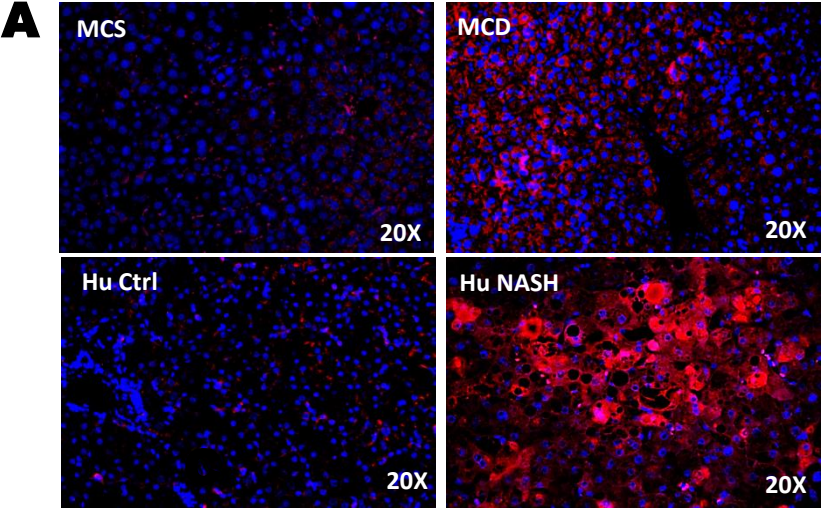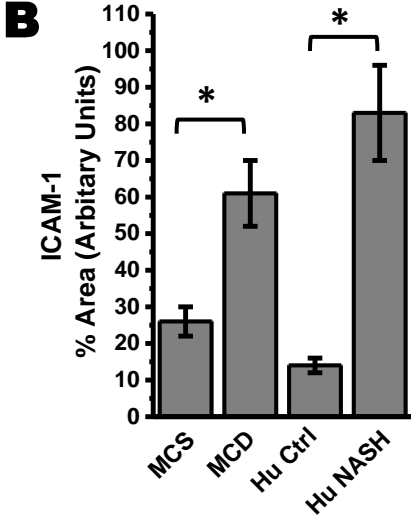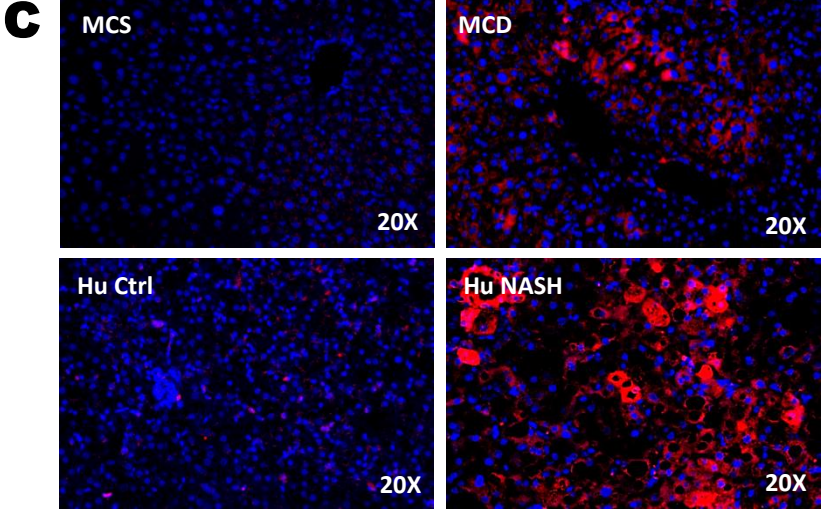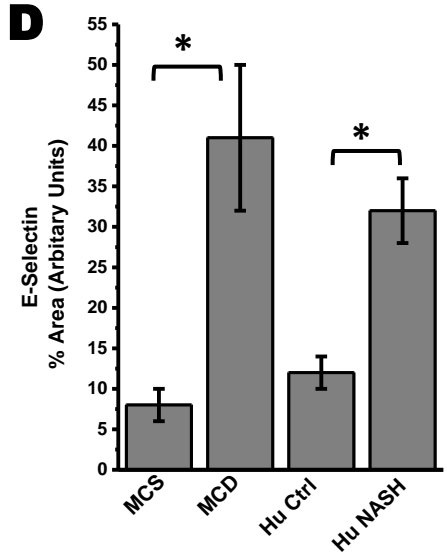

Supplement: mmc3.pdf [file mmc3.pdf]

# Suppl. fig. 4

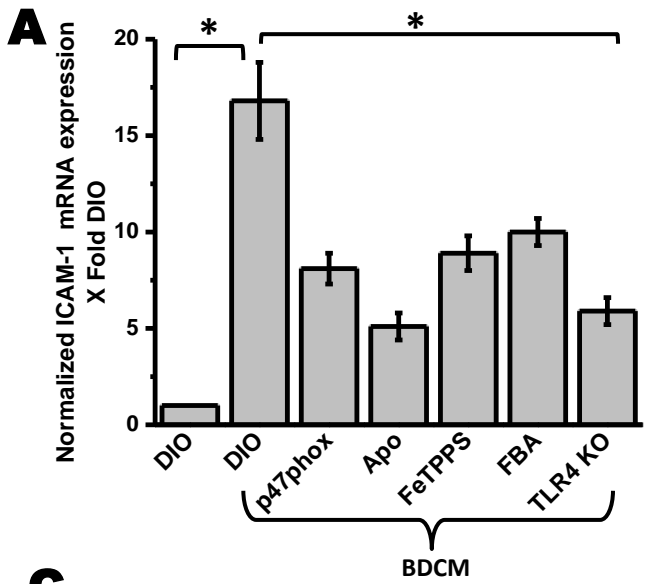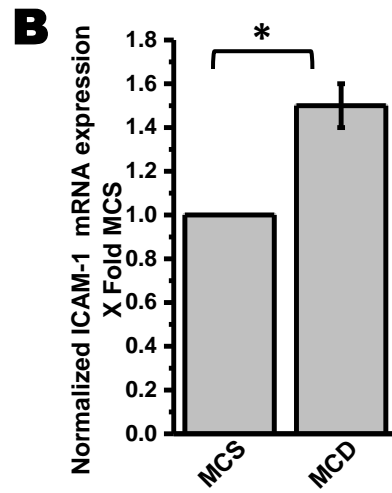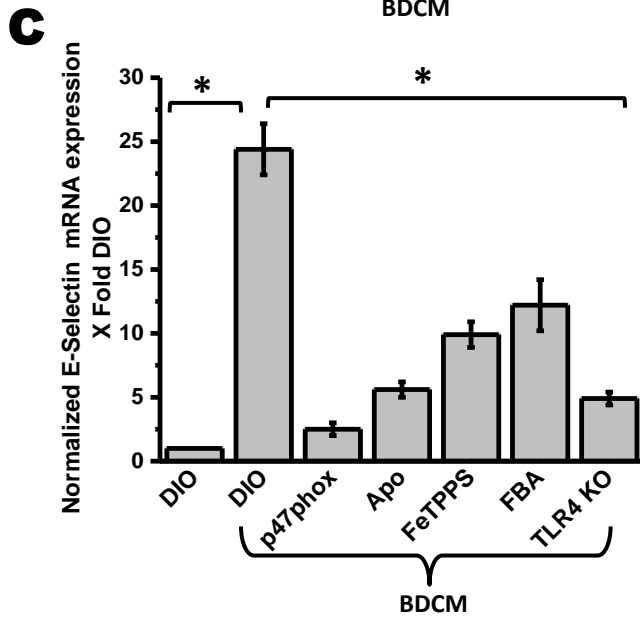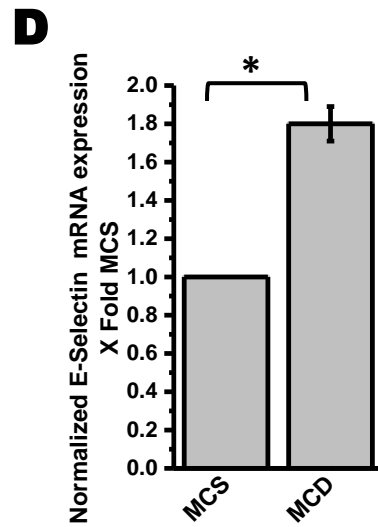

Supplement: mmc4.pdf [file mmc4.pdf]

# Suppl. fig. 5

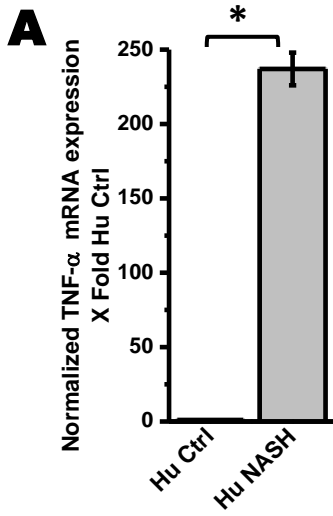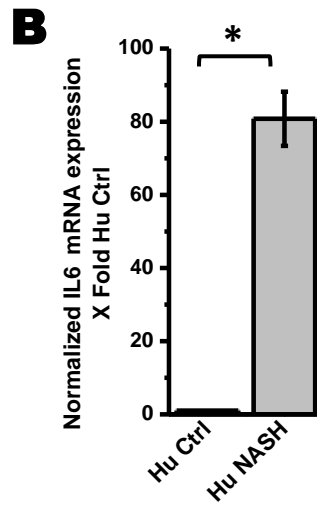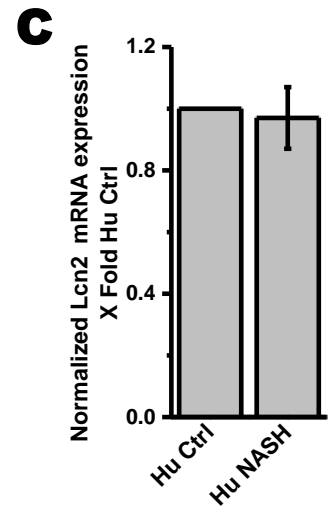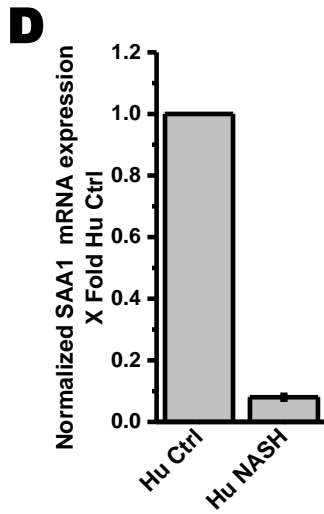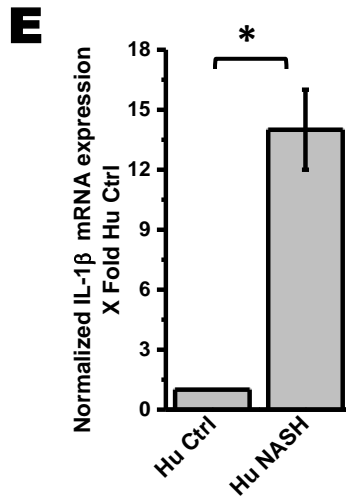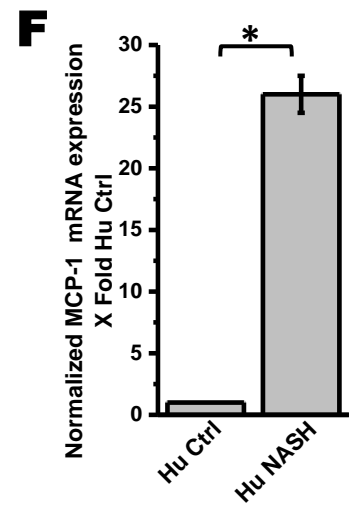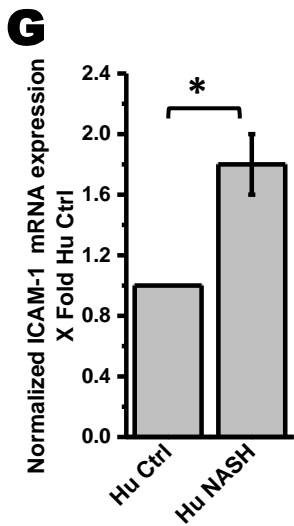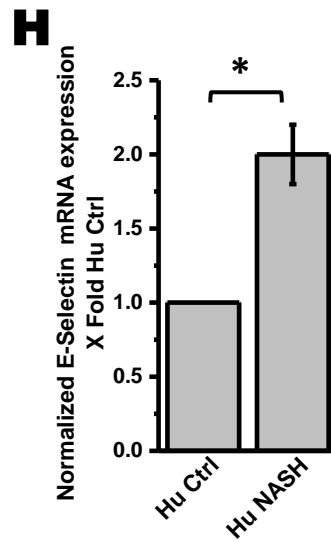

Supplement: mmc5.pdf [file mmc5.pdf]

# Suppl. fig. 6

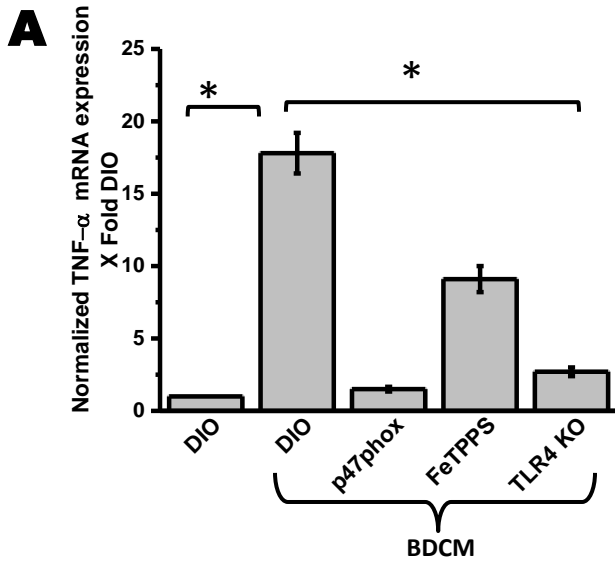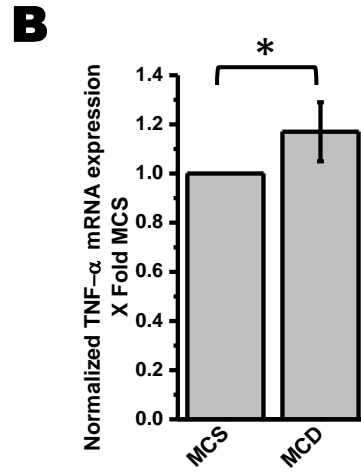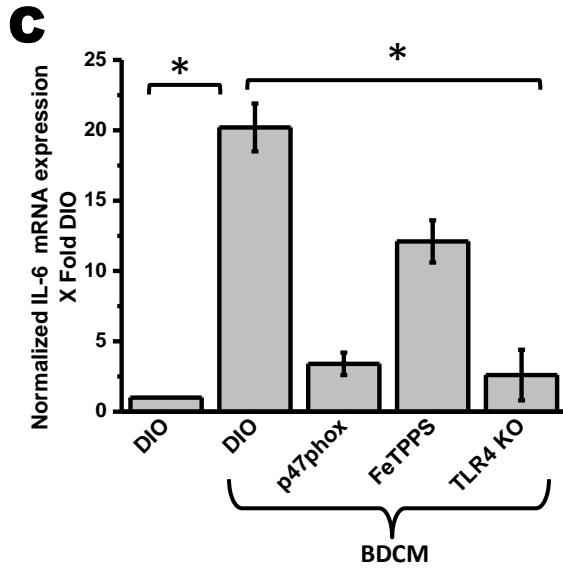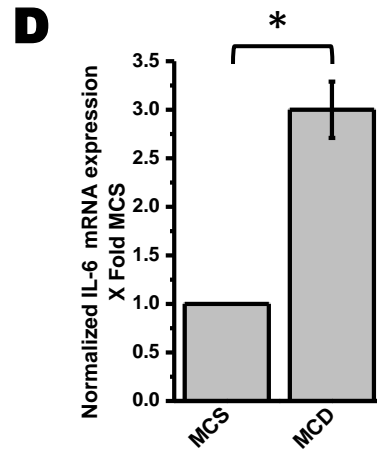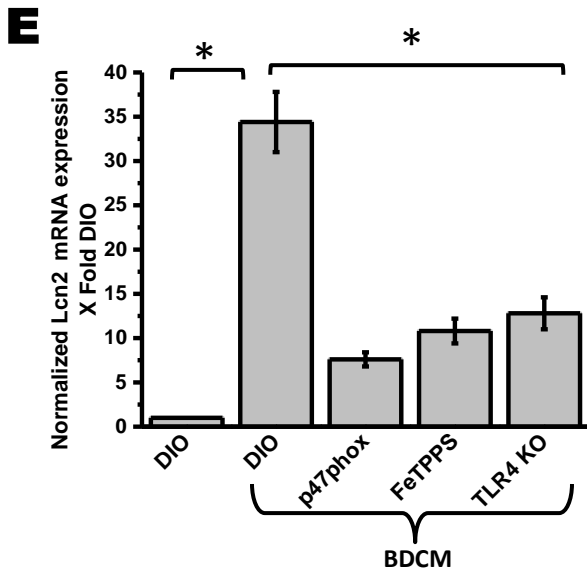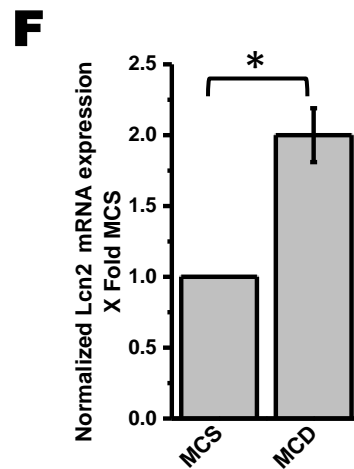

Supplement: mmc6.pdf [file mmc6.pdf]

# Suppl. fig. 7

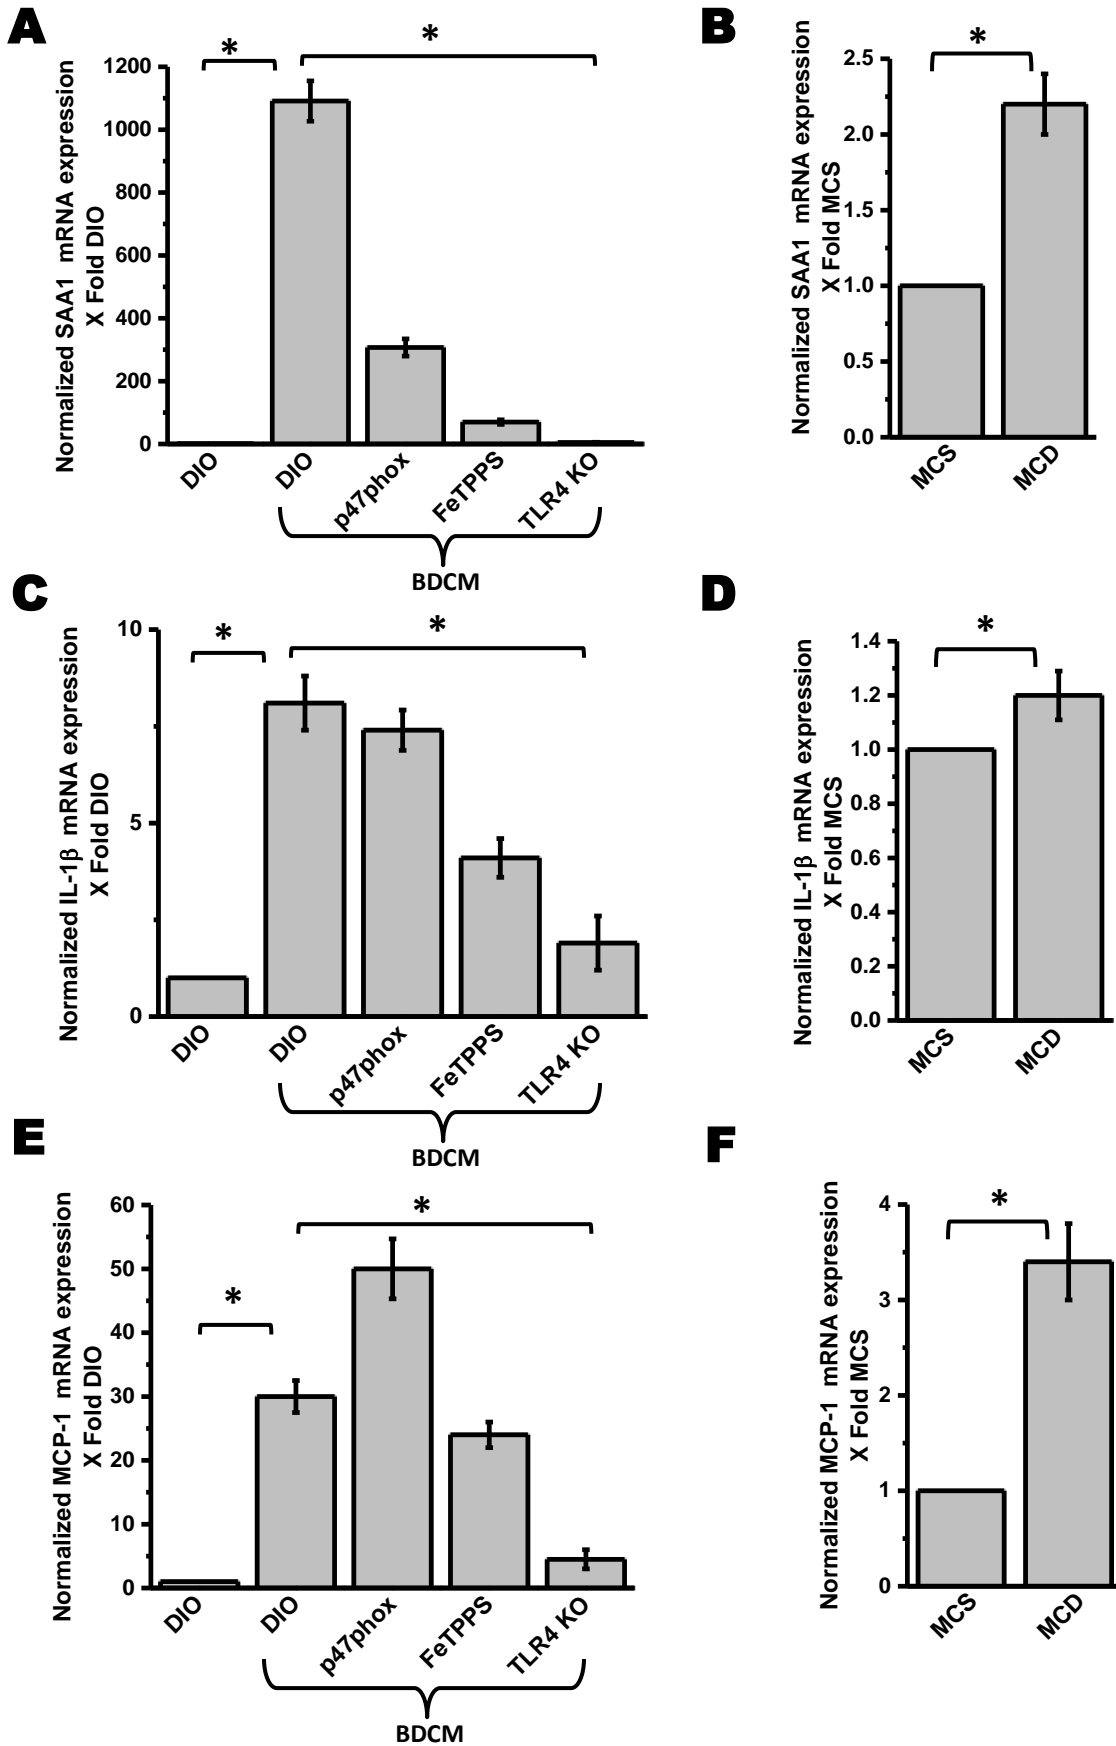

Supplement: mmc7.pdf [file mmc7.pdf]

# Suppl. fig. 8

## A

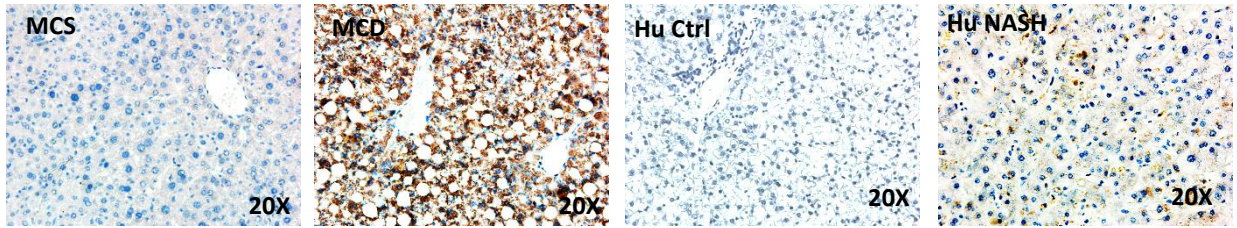

## B

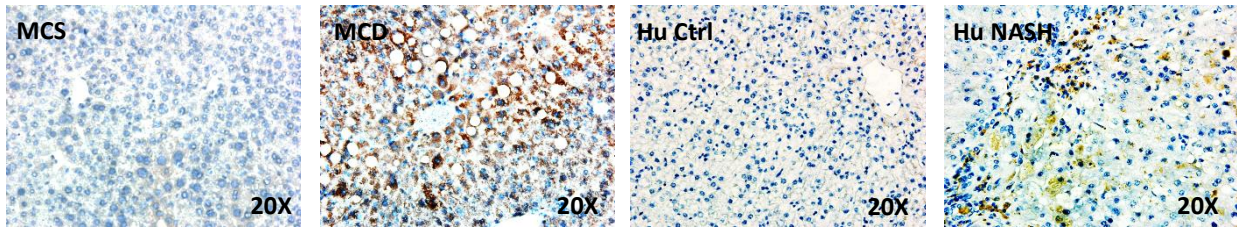

## C

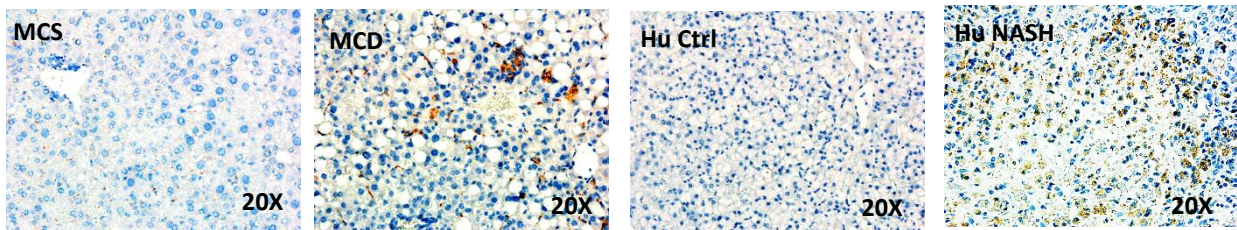

## D

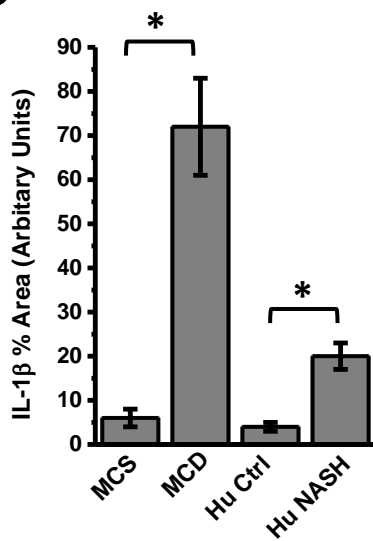

## E

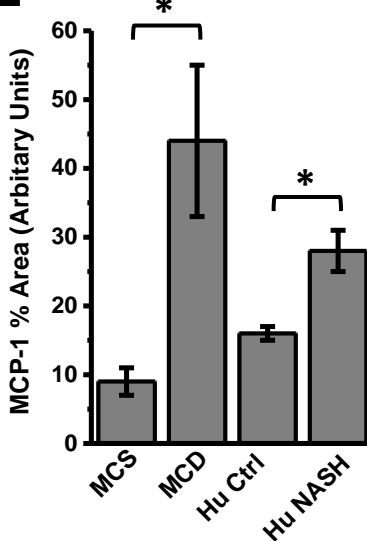

## F

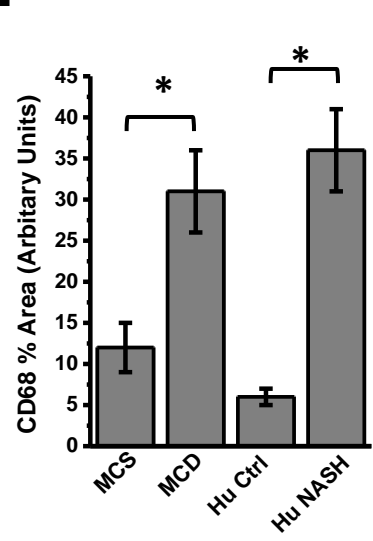

Supplement: mmc8.pdf [file mmc8.pdf]

# Suppl. fig. 9

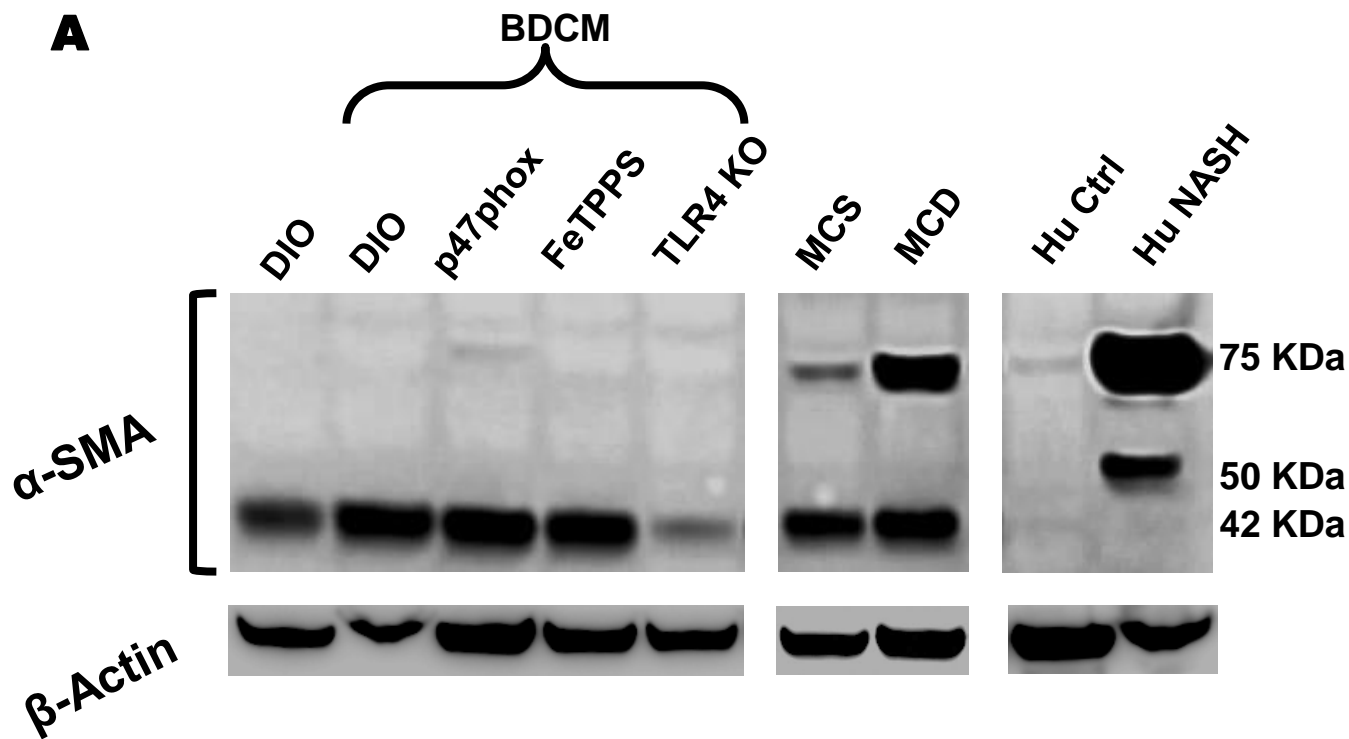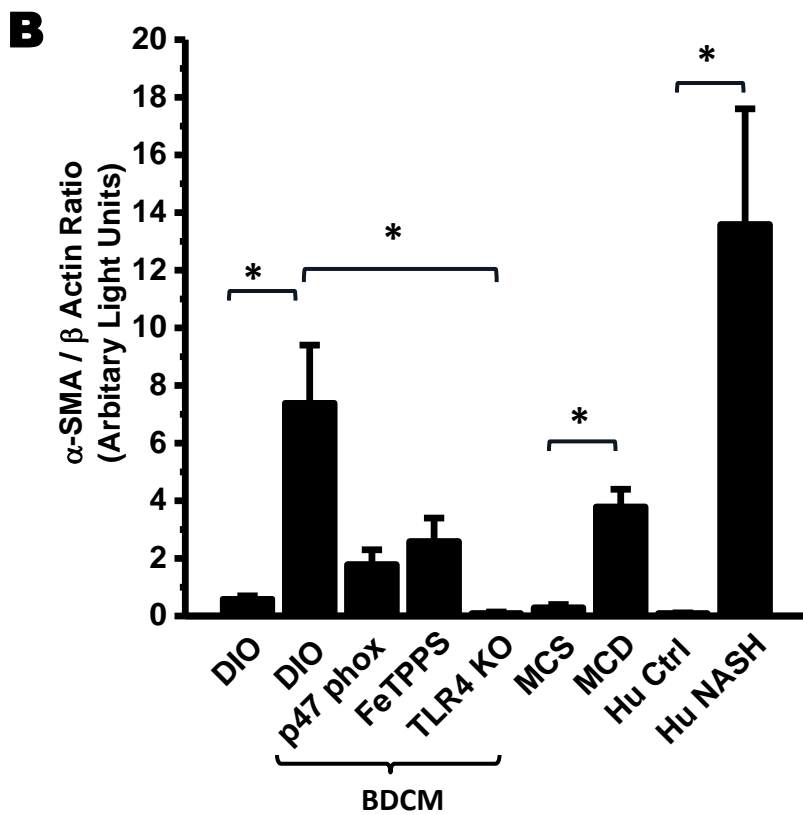

Supplement: mmc9.pdf [file mmc9.pdf]
